# Supplementary material for: Complementary Assessment of Commercial Photoluminescent Pigments Printed on Cotton Fabric
Source: MDPI journal article supplement (doi:10.3390/polym11071216), 2019-07-20
Supplement: s1 [file s1]

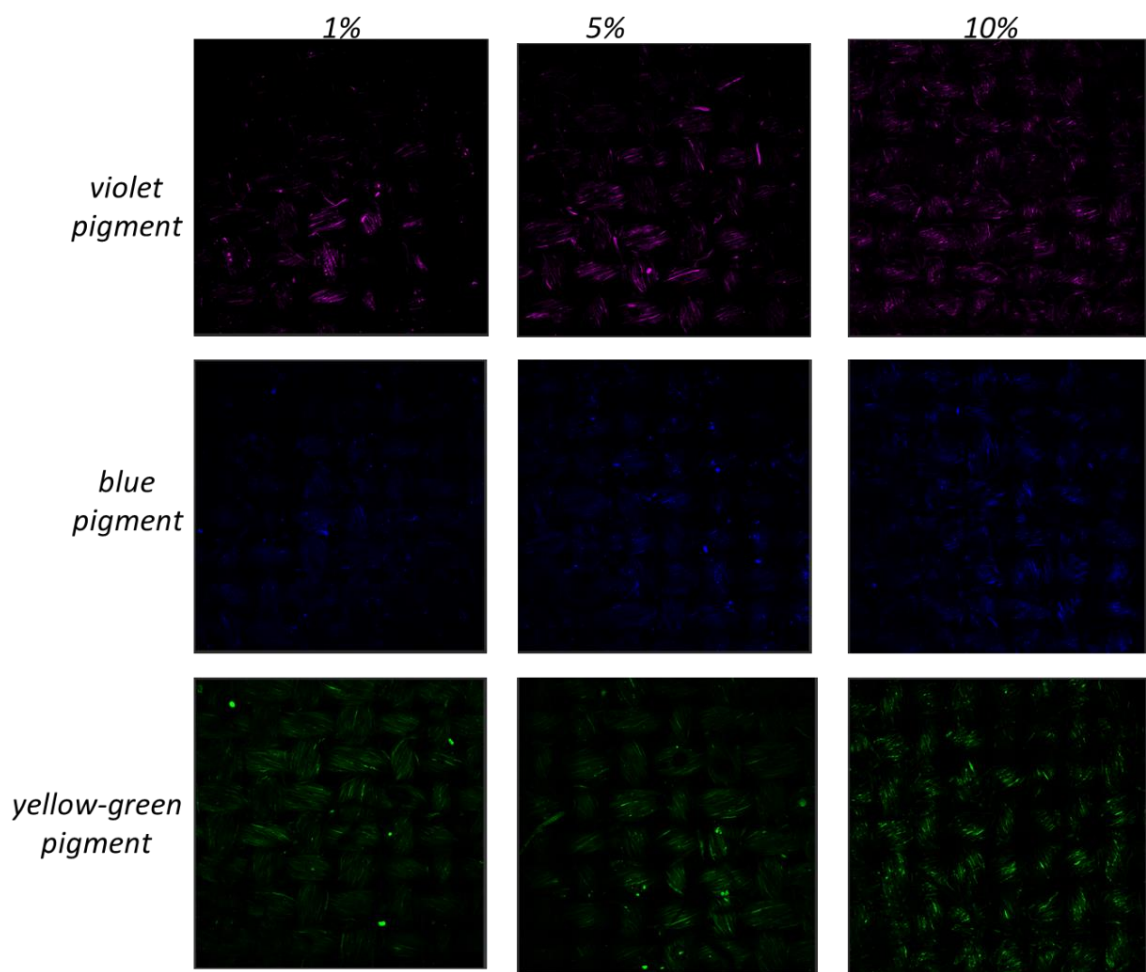

**Supplementary data 1.** Confocal microscopy images for 1%, 5% and 10% of violet, blue and yellow-green pigments printed on cotton fabric by screen printing technology, using PDMS binder.

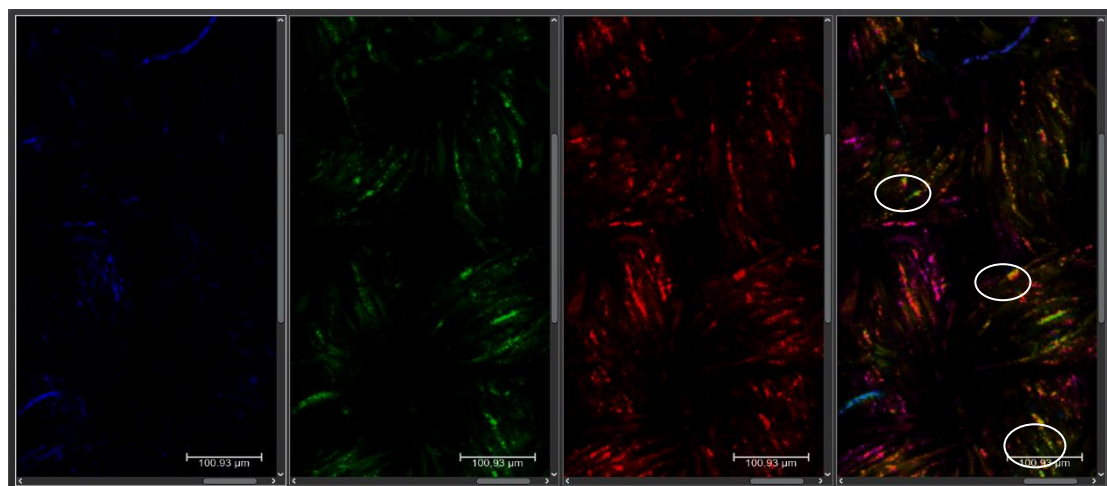

**Supplementary data 1.** Deep color-coded, zoomed images obtained from confocal microscopy, visualizing presence of yellow-green pigment within cotton fabric, when screen printed at 10% concentration.
